# Supplementary material
Source: Royal Society of Chemistry journal article supplement (doi:10.1039/d5ew01127b)
Supplement: d5ew01127b1.pdf [file d5ew01127b1.pdf]

## Supplementary Information

### Effective Biofouling Control of Reverse Osmosis Membranes via Plant Extract Coating

Farzin Saffarimiandoab <sup>\*a</sup>, Alireza Shamsinezhad <sup>a</sup>, Hamidreza Mirzaei <sup>a</sup>, Sadegh Saffarzadeh

Hosseini <sup>b</sup>, Nicky Eshtiaghi <sup>c</sup>, Mohammad Hossein Sarrafzadeh <sup>\*a</sup>

a. UNESCO Chair on Water Reuse, School of Chemical Engineering, University of Tehran,  
Tehran 1417744159, Iran.

b. Abadan Faculty of Petroleum Engineering, Petroleum University of Technology, Abadan,  
6318714317, Iran.

c. Chemical and Environmental Engineering, RMIT University, VIC 3000, Australia

Corresponding authors: Mohammad Hossein Sarrafzadeh, [sarrafzdh@ut.ac.ir](mailto:sarrafzdh@ut.ac.ir);

Farzin Saffarimiandoab, [saffari101@gmail.com](mailto:saffari101@gmail.com);

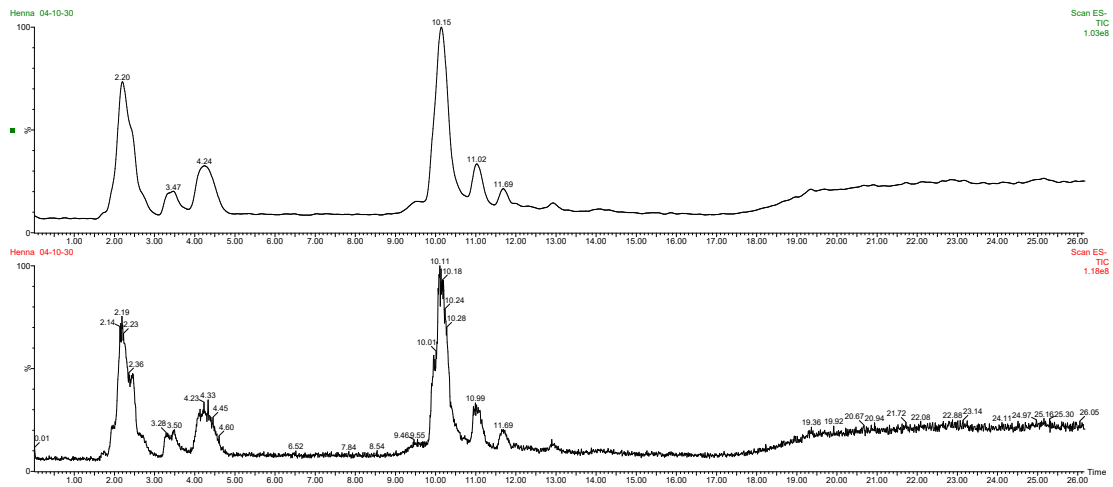

Figure S1. The ion chromatogram for henna.

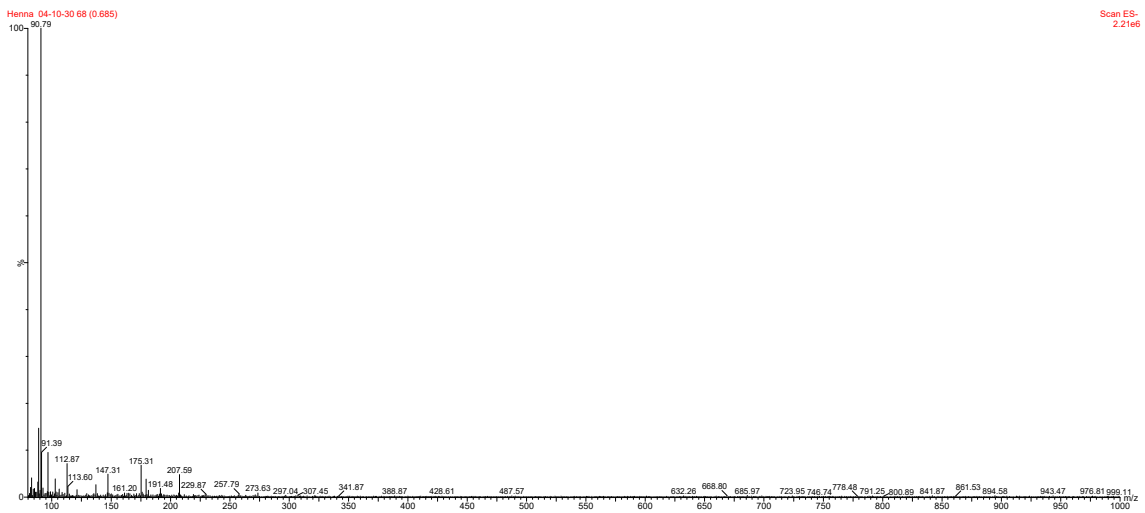

Figure S2. The mass spectrum baseline for henna.

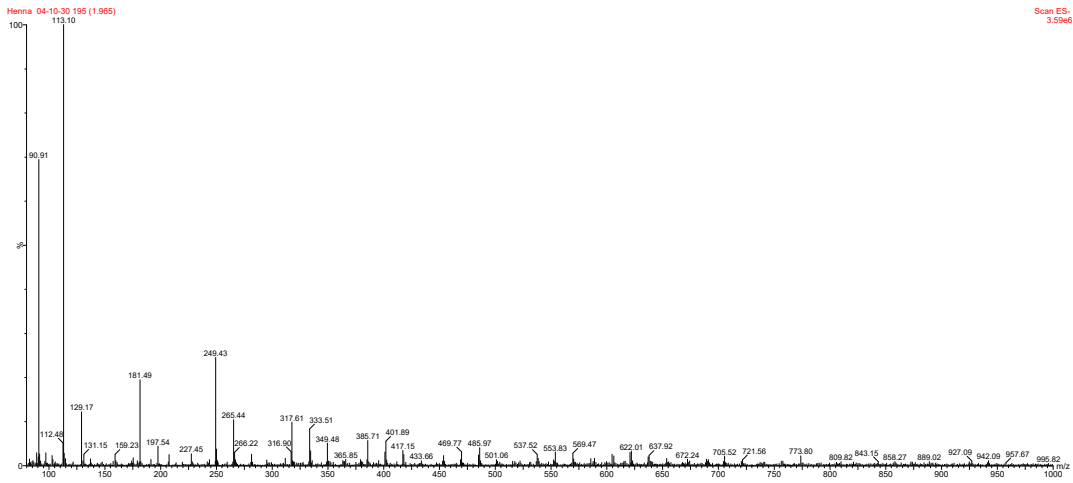

Figure S3. The mass spectrum for henna at retention time of 1.965 min.

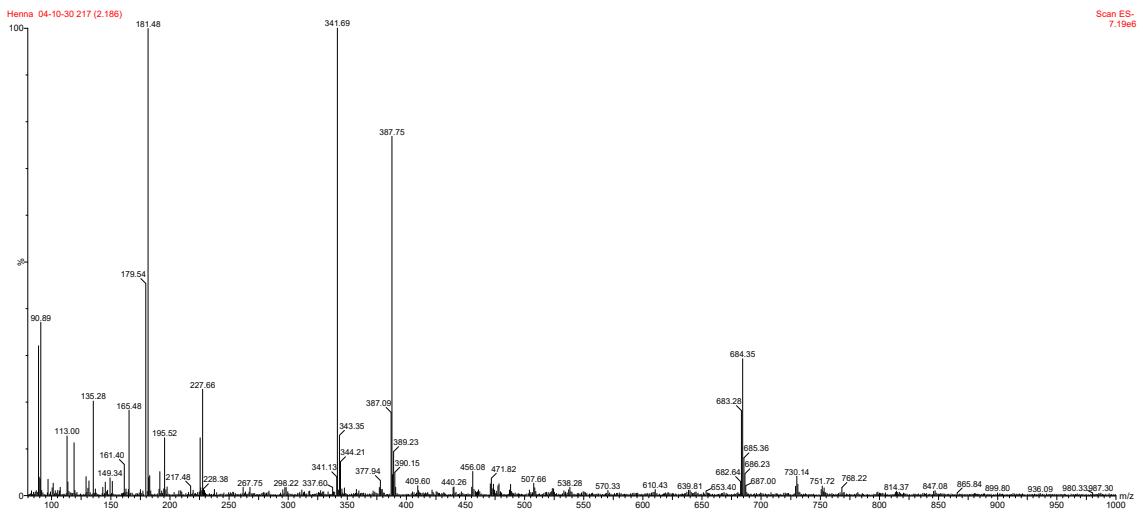

Figure S4. The mass spectrum for henna at retention time of 2.186 min.

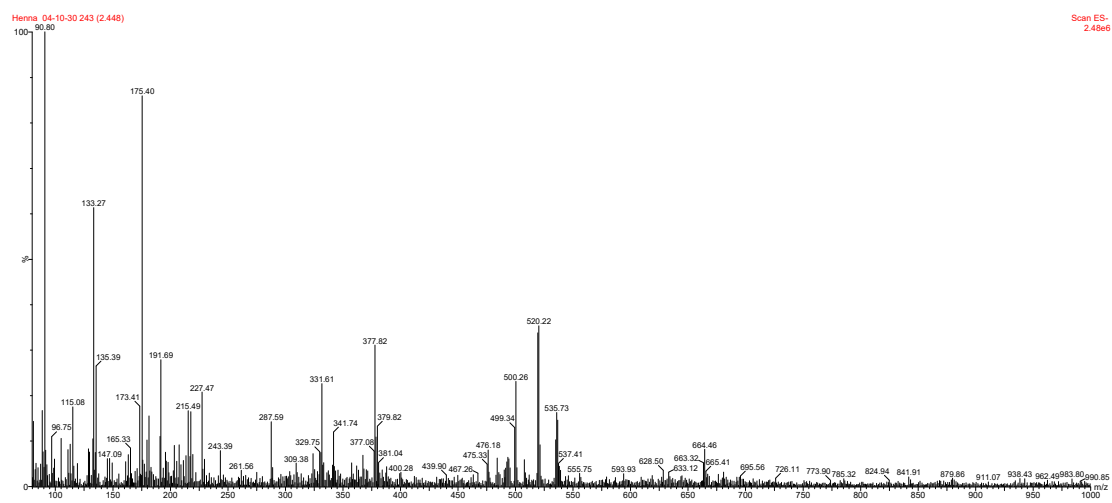

Figure S5. The mass spectrum for henna at retention time of 2.448 min.

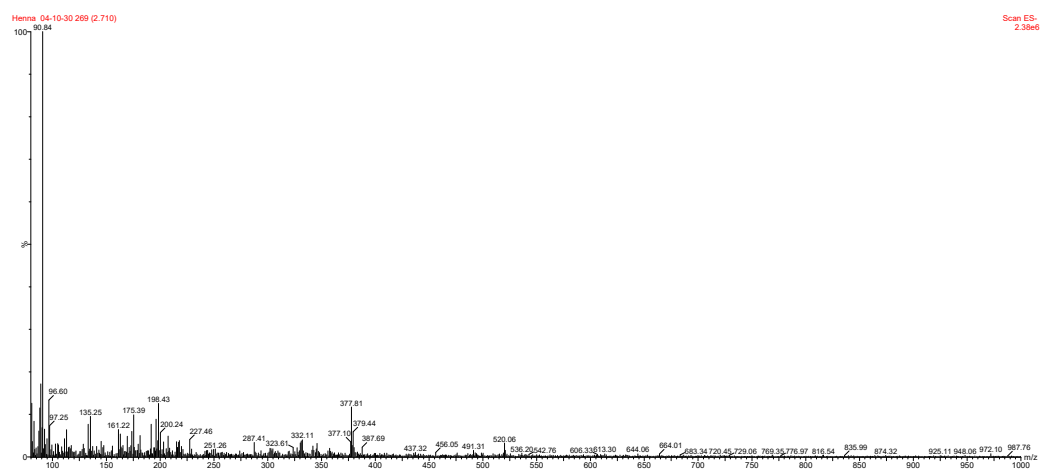

Figure S6. The mass spectrum for henna at retention time of 2.710 min.

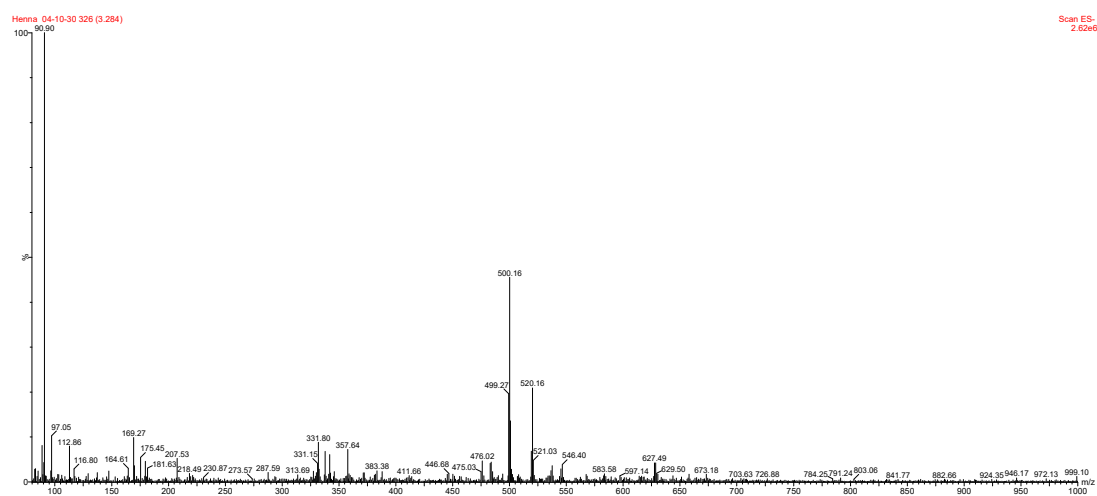

Figure S7. The mass spectrum for henna at retention time of 3.284 min.

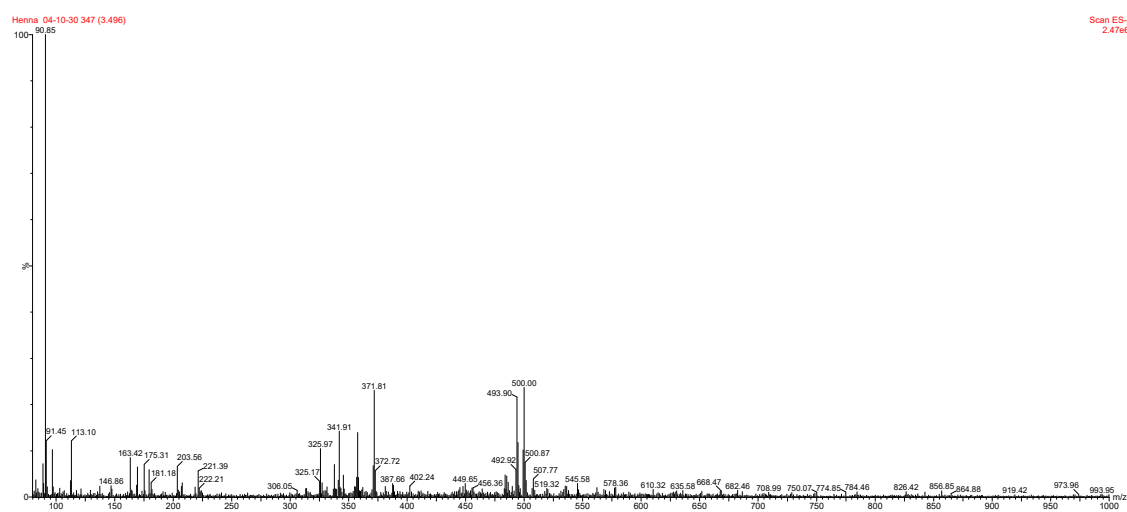

Figure S8. The mass spectrum for henna at retention time of 3.496 min.

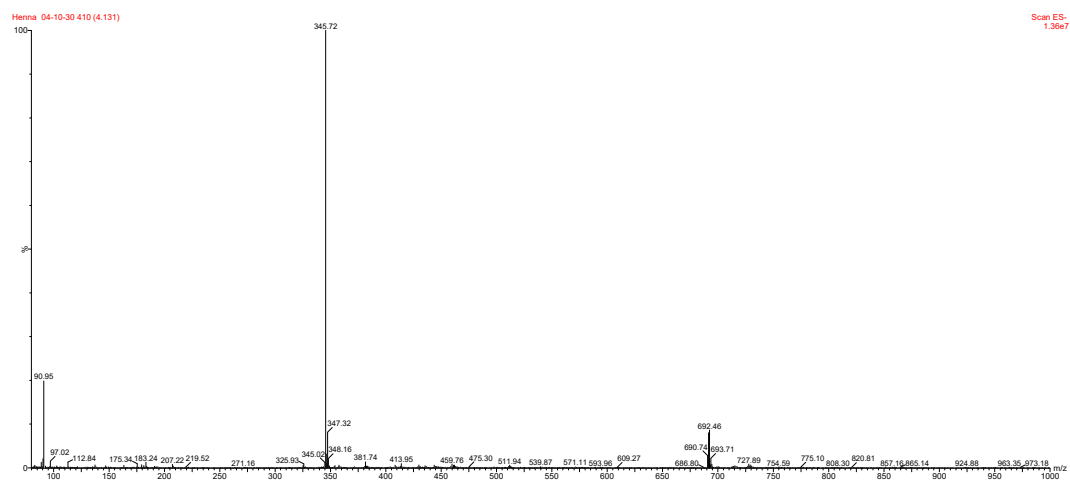

Figure S9. The mass spectrum for henna at retention time of 4.131 min.

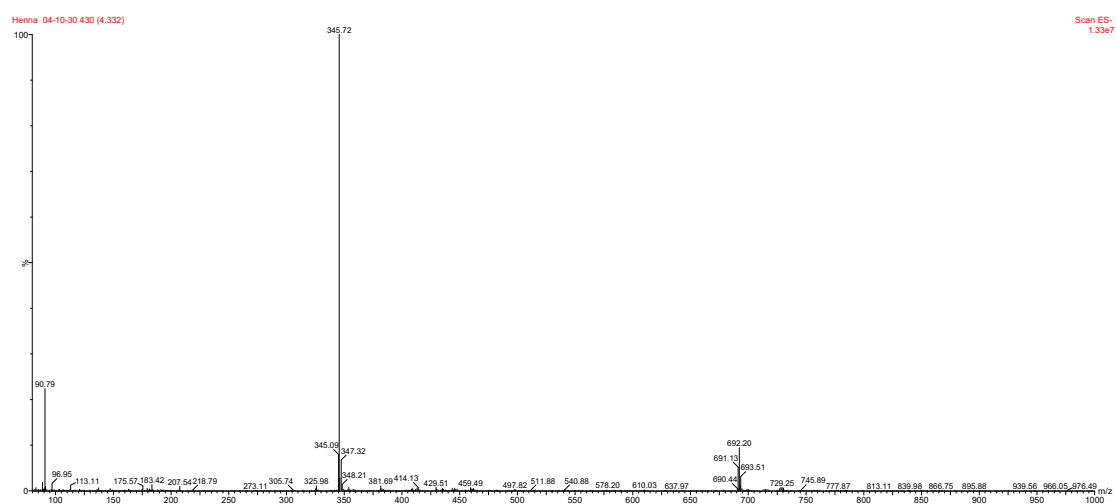

Figure S10. The mass spectrum for henna at retention time of 4.332 min.

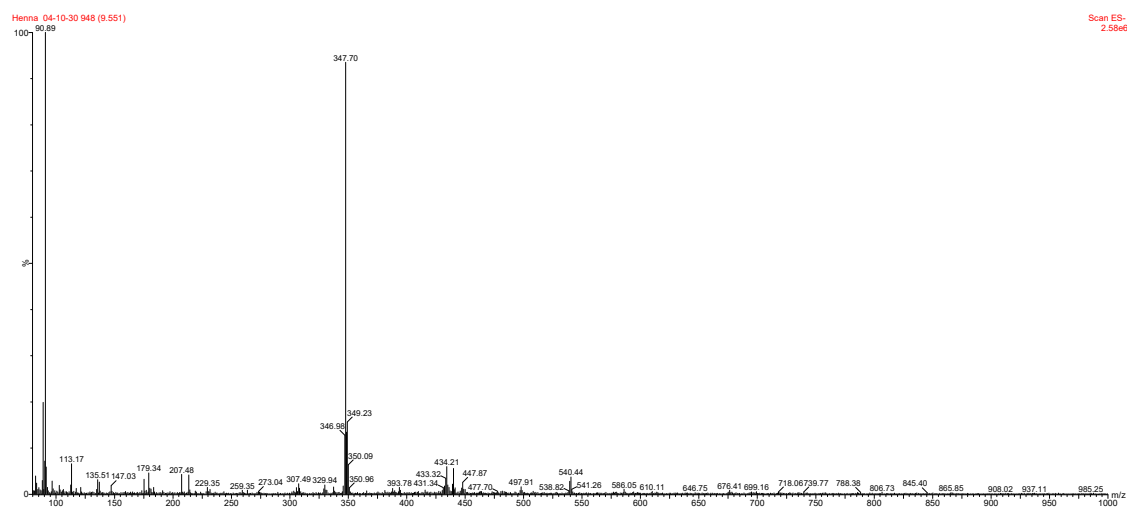

Figure S11. The mass spectrum for henna at retention time of 9.551 min.

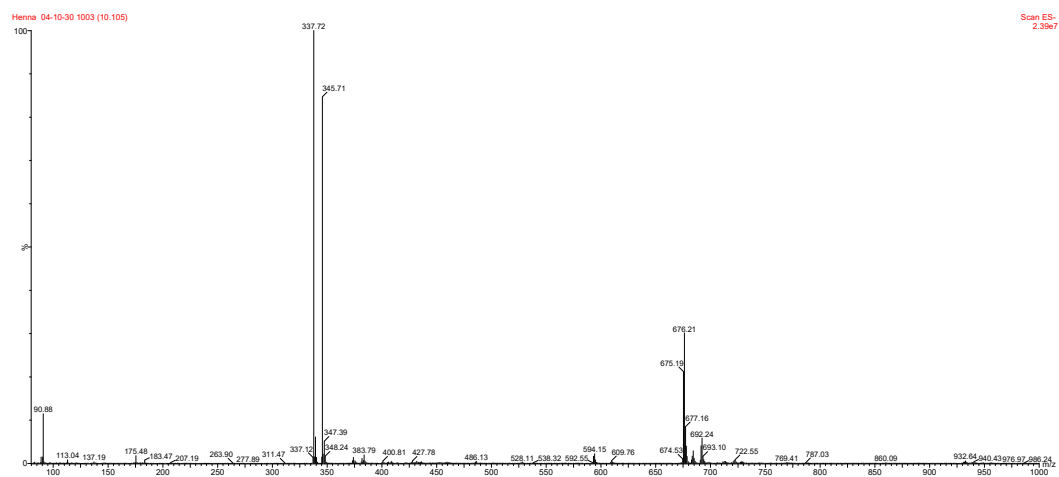

Figure S12. The mass spectrum for henna at retention time of 10.105 min.

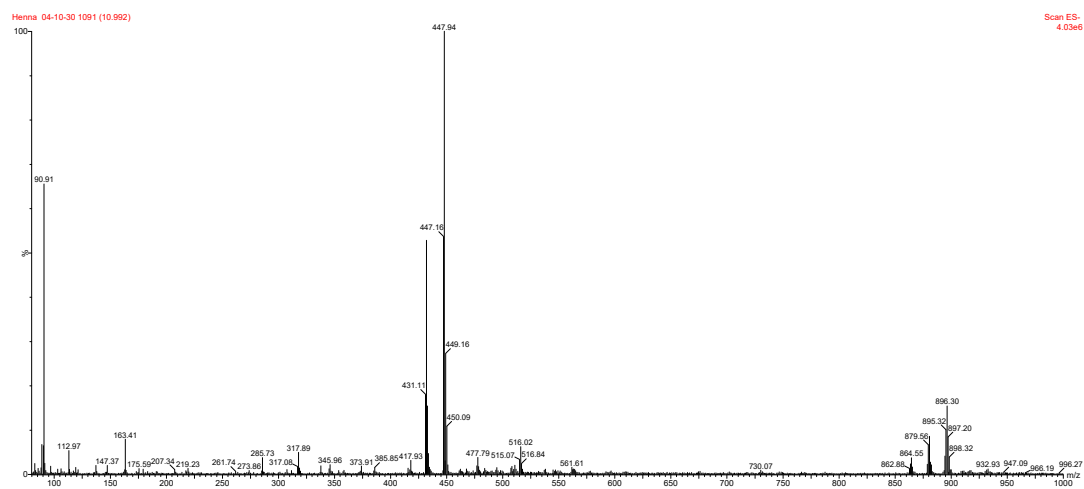

Figure S13. The mass spectrum for henna at retention time of 10.992 min.

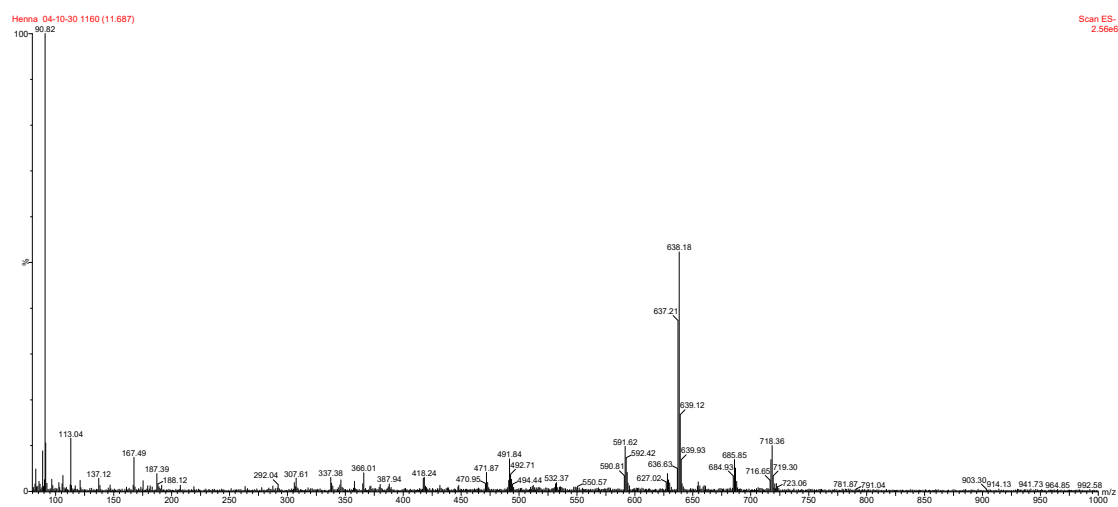

Figure S14. The mass spectrum for henna at retention time of 11.687 min.

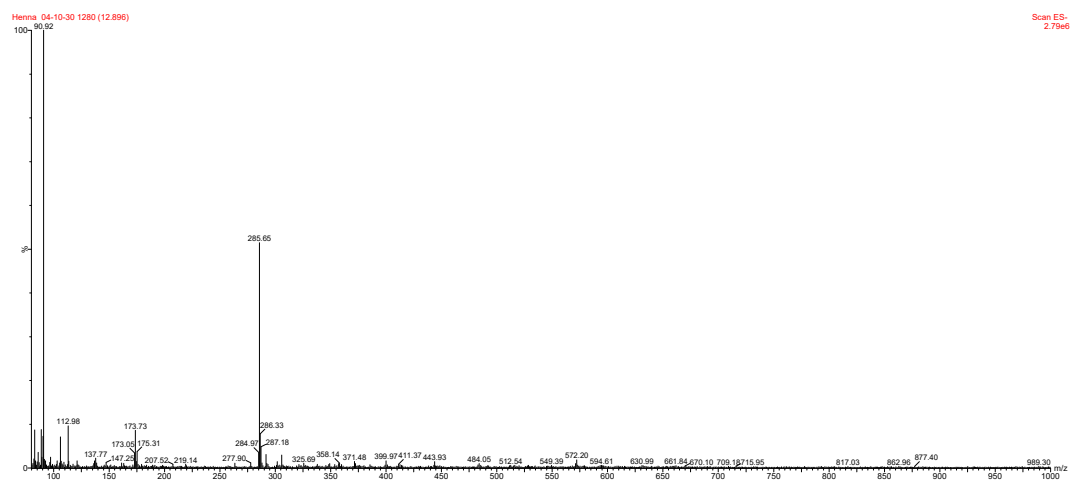

Figure S15. The mass spectrum for henna at retention time of 12.896 min.

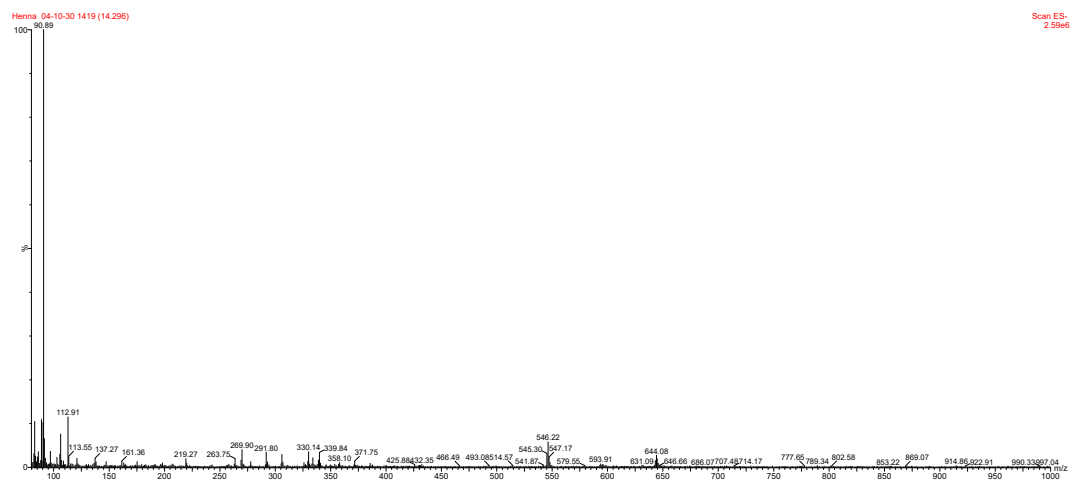

Figure S16. The mass spectrum for henna at retention time of 14.296 min.

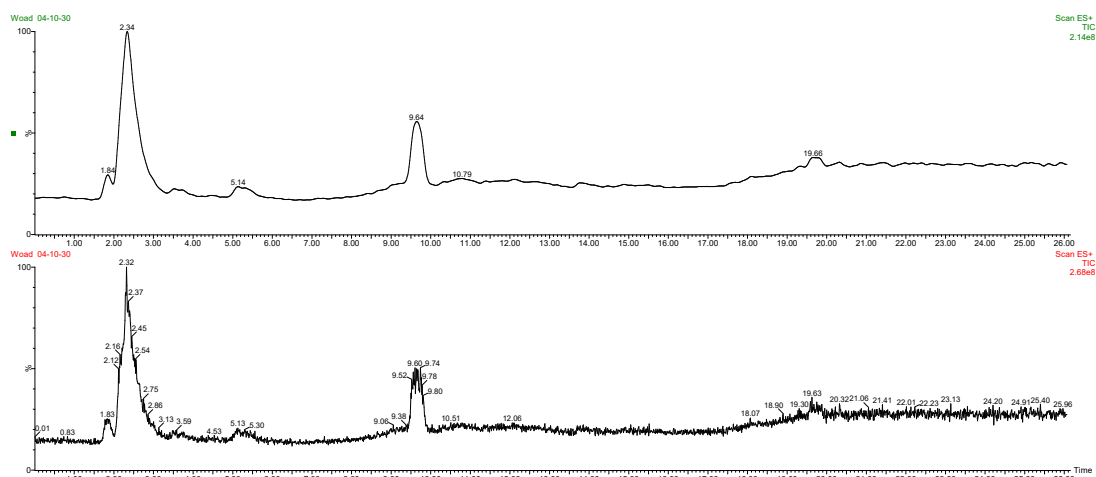

Figure S17. The ion chromatogram for woad.

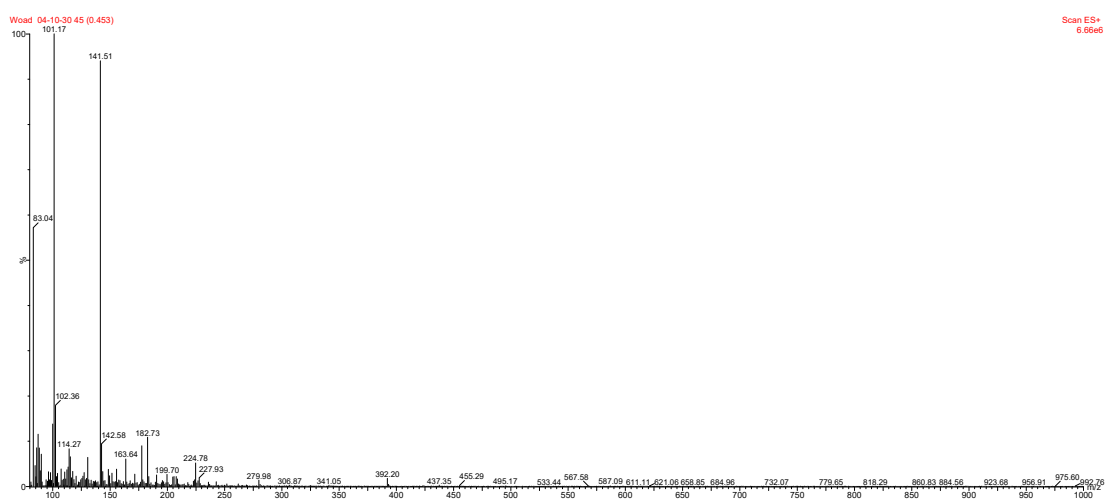

Figure S18. The baseline mass spectrum for woad.

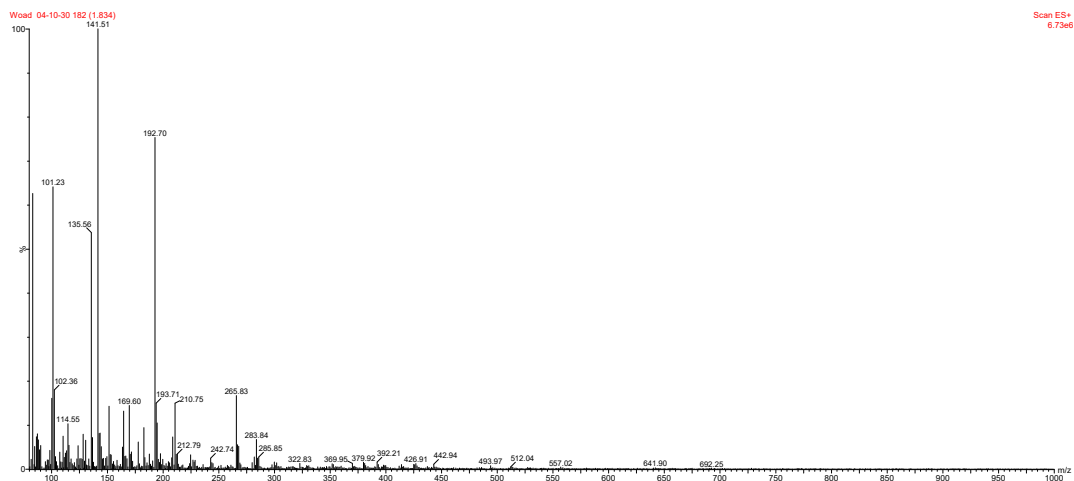

Figure S19. The mass spectrum for woad at retention time of 1.834 min.

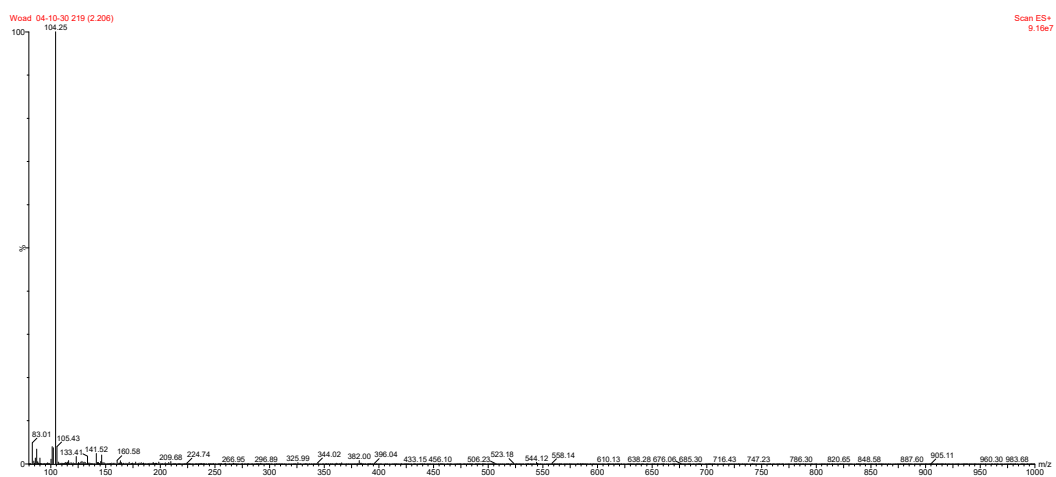

Figure S20. The mass spectrum for woad at retention time of 2.206 min.

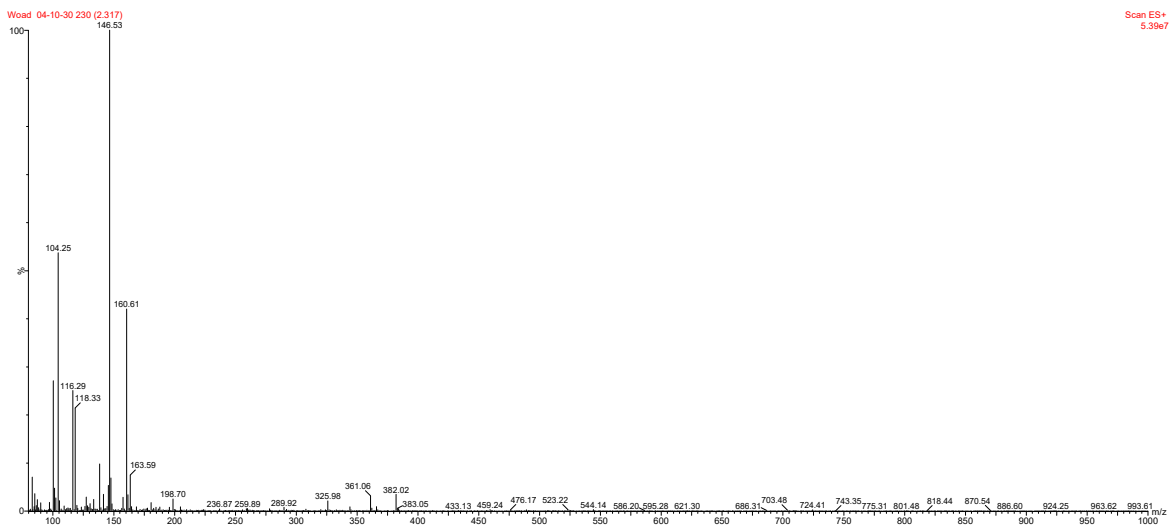

Figure S21. The mass spectrum for woad at retention time of 2.37 min.

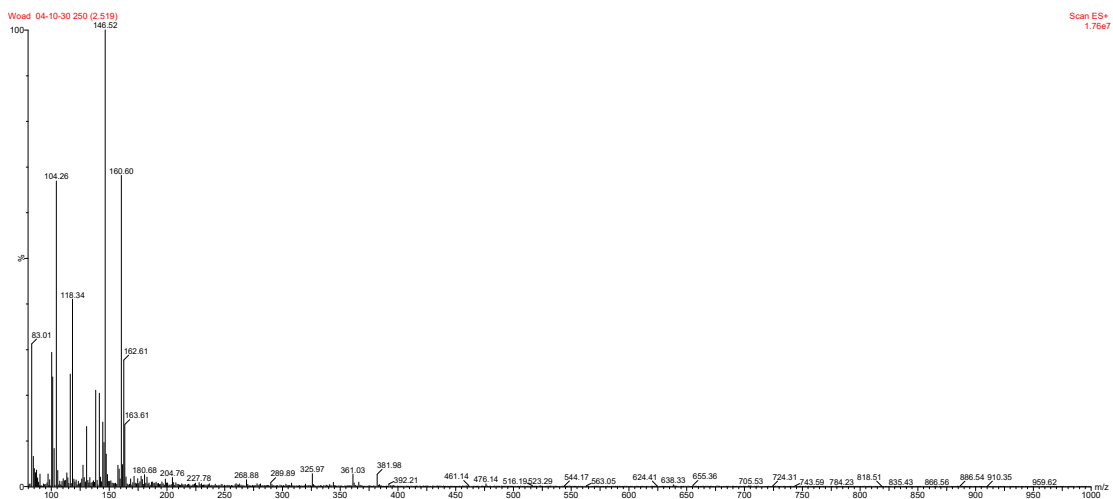

Figure S22. The mass spectrum for woad at retention time of 2.519 min.

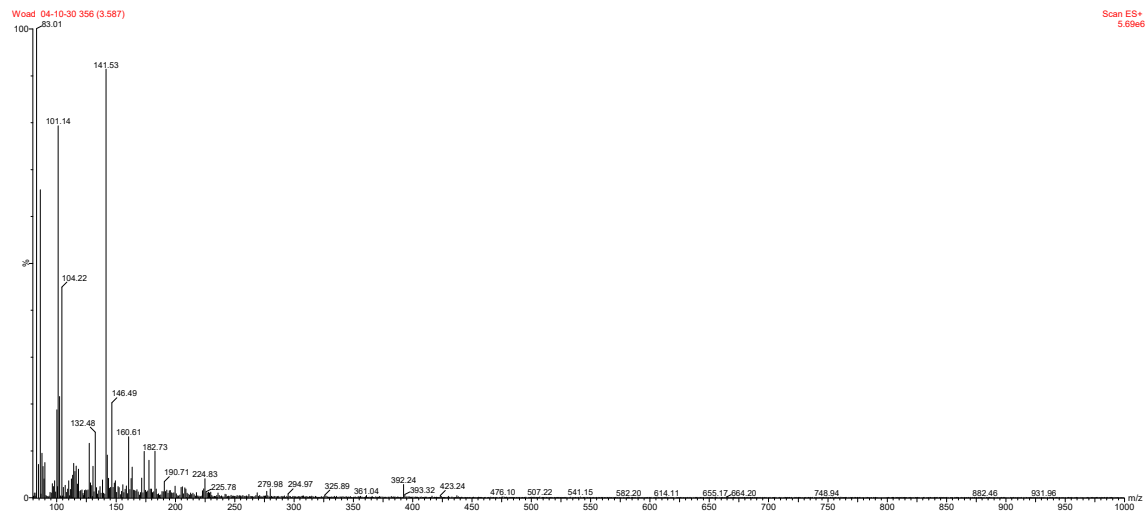

Figure S23. The mass spectrum for woad at retention time of 3.587 min.

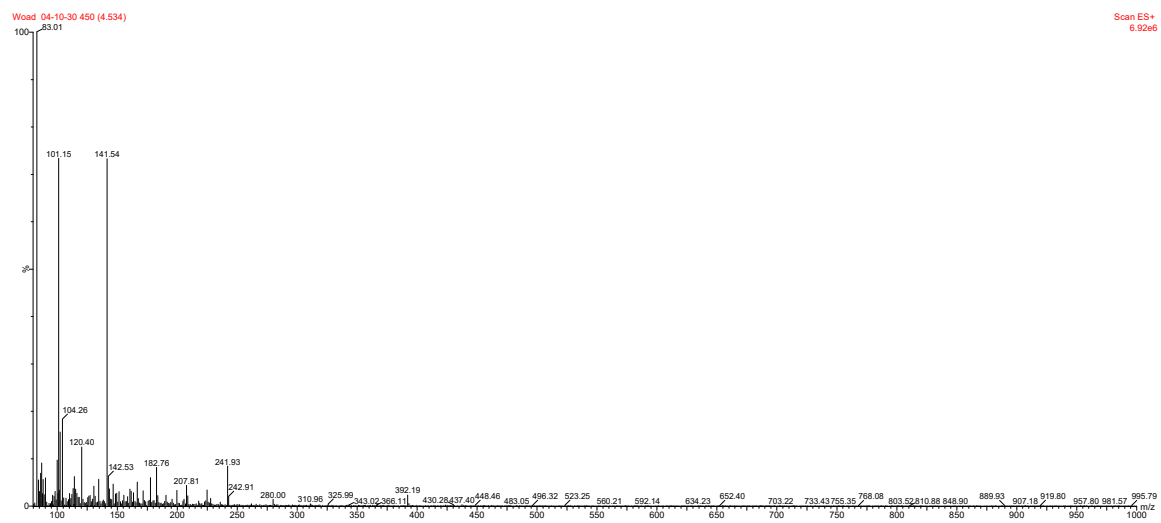

Figure S24. The mass spectrum for woad at retention time of 4.534 min.

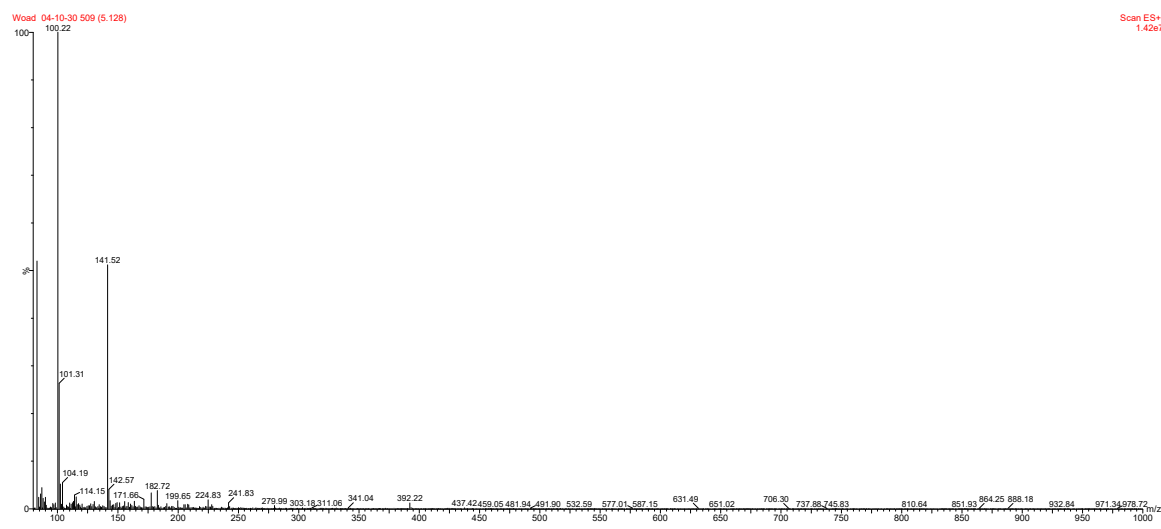

Figure S25. The mass spectrum for woad at retention time of 5.128 min.

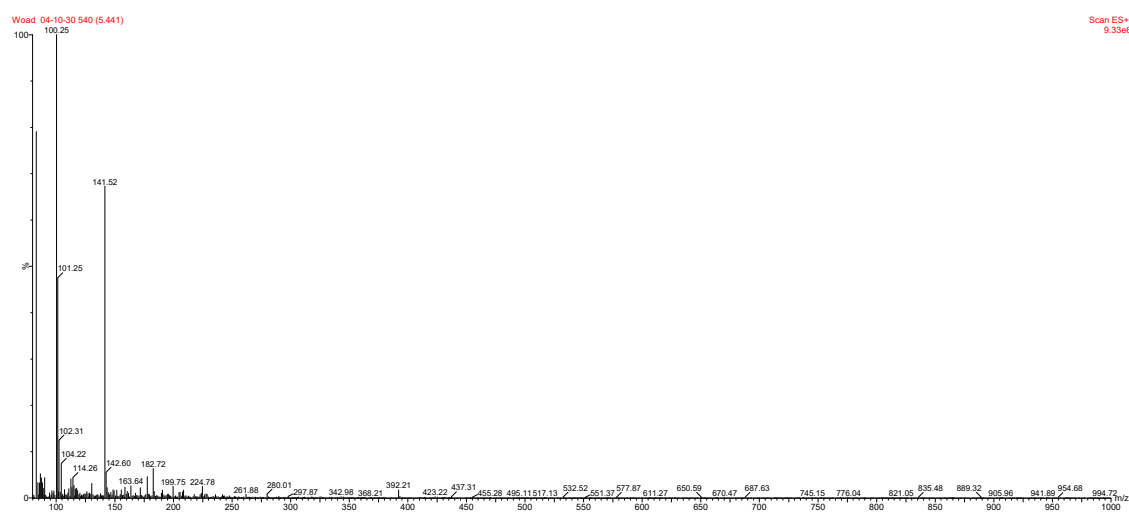

Figure S26. The mass spectrum for woad at retention time of 5.441 min.

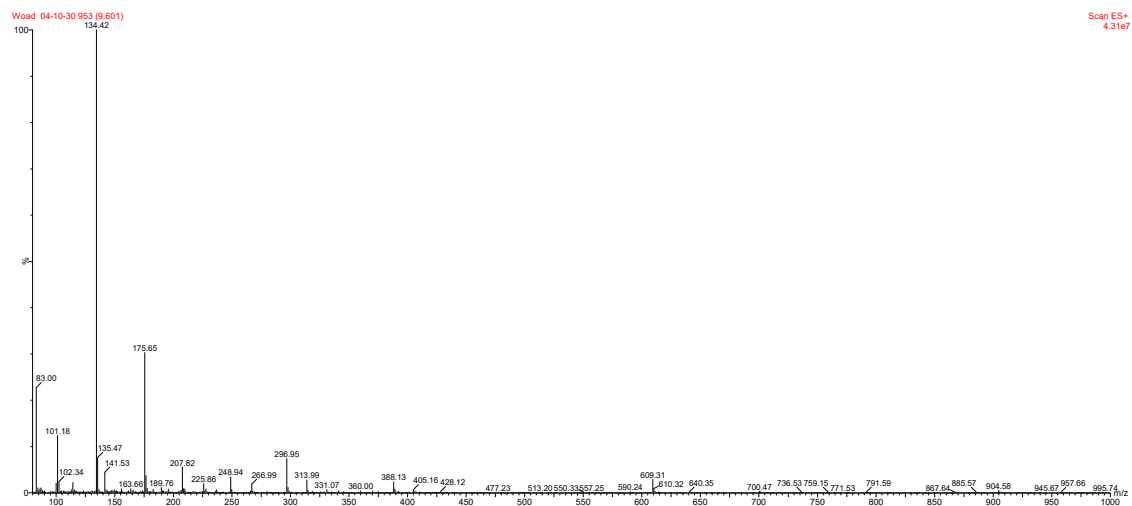

Figure S27. The mass spectrum for woad at retention time of 9.601 min.

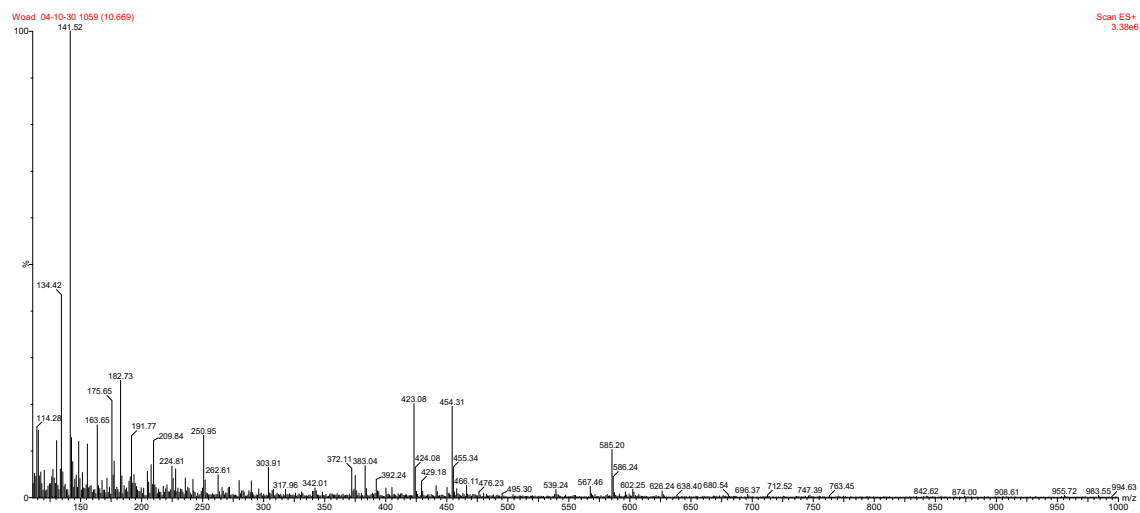

Figure S28. The mass spectrum for woad at retention time of 10.669 min.

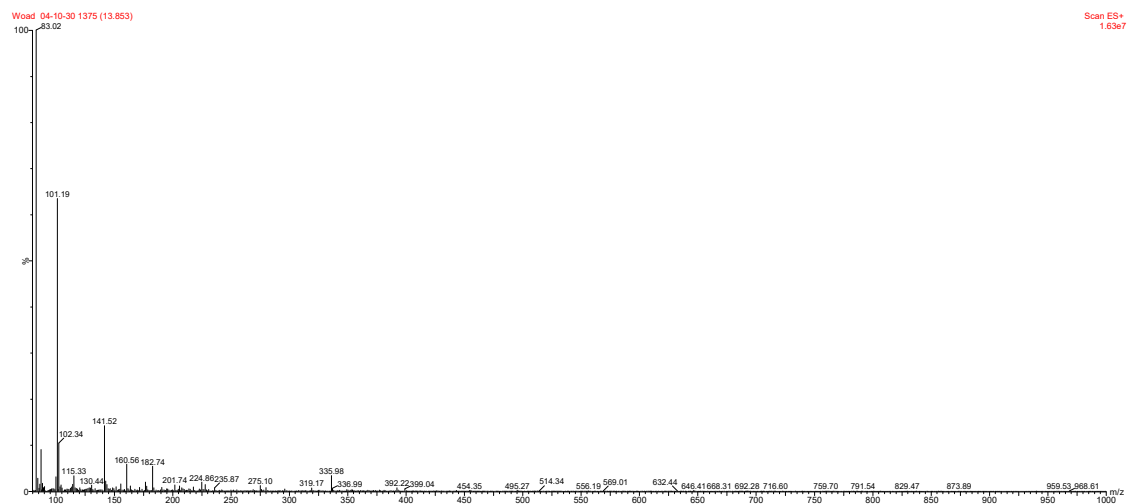

Figure S29. The mass spectrum for woad at retention time of 13.853 min.

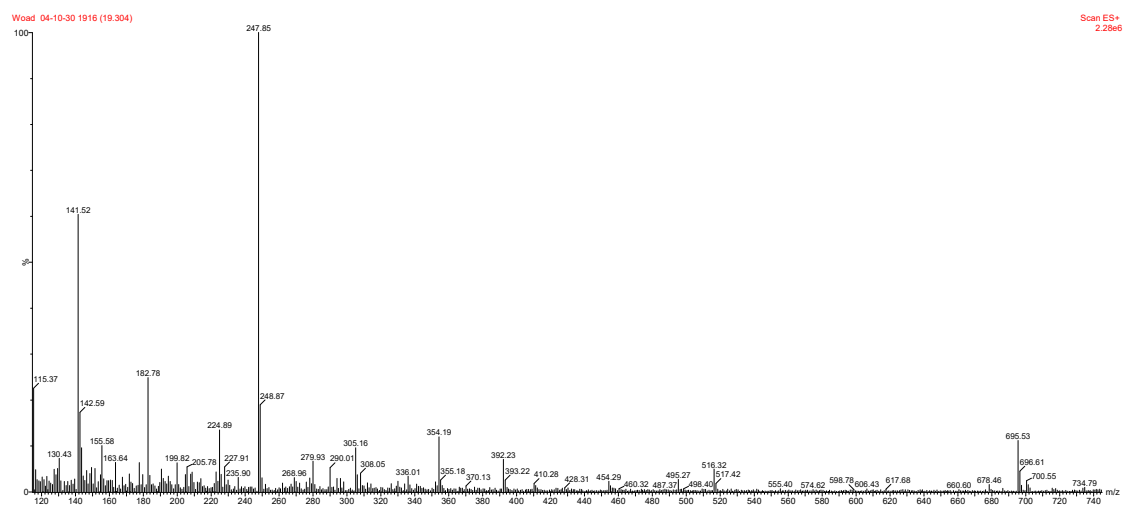

Figure S30. The mass spectrum for woad at retention time of 19.304 min.

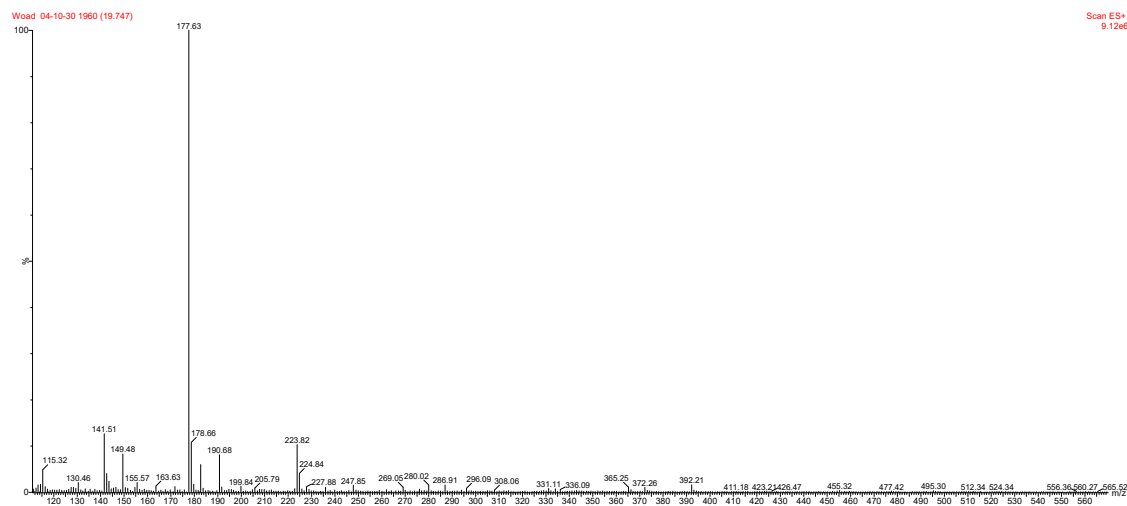

Figure S31. The mass spectrum for woad at retention time of 19.747 min.
